# Supplementary material for: Review article: Performance assessment of electromagnetic wave-based field sensors for SWE monitoring
Source: Copernicus journal article supplement (doi:10.5194/tc-2021-163), 2021-06-02
Supplement: Supplementary file [file tc-2021-163-AC5-supplement.pdf]

## Note to the editor: Comment on tc-2021-163

There are 4 referees comment on "Review article: Performance assessment of electromagnetic wave- based field sensors for SWE monitoring " by Alain Royer et al., The Cryosphere Discuss., <https://doi.org/10.5194/tc-2021-163>, 2021

Referee 1 RC1 : Craig Smith

Referee 2 RC2: Charles Fierz

Comment CC1: Floriant Appel

Comment CC2 : Yves Choquette (personale communication). The responses to its review was also included. It was sent to me directly by e-mail instead of being submitted by the journal.

We thank all reviewers for the helpful and constructive comments that helped improve the manuscript. Every comment was addressed, and a detailed list of modifications is attached (one document per reviewers).

Note that the title was changed following comments.

The revised article was proofread by an English-speaking scientific translator, but not the responses/explanations to the reviewers.

We also integrated three important references which were missing:

Gugerli, R., Salzmann, N., Huss, M., and Desilets, D.: Continuous and autonomous snow water equivalent measurements by a cosmic ray sensor on an alpine glacier, *The Cryosphere*, 13, 3413–3434, <https://doi.org/10.5194/tc-13-3413-2019>, 2019. (**CRNP** and **Snow core**)

Wallbank, J.R., Cole, S.J., Moore, R.J., Anderson, S.R., Mellor, E.J.: Estimating snow water equivalent using cosmic-ray neutron sensors from the COSMOS-UK network. *Hydrological Processes*, 35:e14048. <https://doi.org/10.1002/hyp.14048>, 2021. (**CRNP**)

Steiner, L., Meindl, M., Fierz, C., and Geiger, A.: An assessment of sub-snow GPS for quantification of snow water equivalent, *The Cryosphere*, 12, 3161–3175, <https://doi.org/10.5194/tc-12-3161-2018>, 2018. (**GNSSr**)

We also added a reference to another Cosmic Ray Neutron probe commercialized by Geonor: COSMIC RAY DETECTOR (CRD), [www.Geonor.com](http://www.Geonor.com), GEONOR Inc., 51 U.S. Highway 206, Suite 201, Branchville, NJ 07822 USA.

### Appendix

Moreover, we have also deepened the analysis of the uncertainty of manual in situ measurements by snowpit and snow core with a thorough analysis of the significant literature.

To lighten the text, we have reported in Appendix\* the analysis of this manual ground measurements, including a new figure from our archives. This figure well illustrates the

issue of the uncertainty in the measurements with the snow core. We also added a lot of references to estimate a mean accuracy of such reference approach.

\* could be an Appendix or a Supplementary material? But the references given in this Appendix are not separated from those of the article.

Alain Royer, on behalf to the co-authors. 27 August 2021
