# Supplementary material for: Review article: Performance assessment of electromagnetic wave-based field sensors for SWE monitoring
Source: Copernicus journal article supplement (doi:10.5194/tc-2021-163), 2021-06-02
Supplement: Supplementary file [file tc-2021-163-RC1-supplement.pdf]

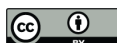

## Review article: Performance assessment of electromagnetic wave-based field sensors for SWE monitoring

Alain Royer<sup>a,b,\*</sup>, Alexandre Roy<sup>c,b</sup>, Sylvain Jutras<sup>d</sup>, Alexandre Langlois<sup>a,b</sup>

<sup>a</sup>Centre d'Applications et de Recherche en Télédétection (CARTEL), Université de Sherbrooke, Sherbrooke, Québec, Canada

<sup>b</sup>Centre d'études nordiques, Québec, Canada

<sup>c</sup>Département des Sciences de l'Environnement, Université du Québec à Trois-Rivières, Trois-Rivières, Québec, Canada

<sup>d</sup>Département des sciences du bois et de la forêt, Université Laval, Québec City, Québec, Canada

\* Corresponding author

### Abstract (138 words)

Continuous and spatially distributed data of snow mass (snow water equivalent, SWE) from automatic ground-based measurements are increasingly required for climate change studies and for hydrological applications (snow hydrological model improvement and data assimilation). We present and compare four new-generation non-invasive sensors that are based on electromagnetic waves for direct measurements of SWE: Cosmic Ray Neutron Probe (CNRP); Gamma Ray Monitoring (GMON) scintillator; frequency-modulated continuous-wave radar (FMCW-Radar) at 24 GHz; and Global Navigation Satellite System (GNSS). All four techniques are relatively low cost, have low power requirements, provide continuous and autonomous measurements, and can be installed in remote areas. Their operating principles are briefly summarized before examples of comparative measurements are provided. A performance review comparing their advantages, drawbacks and accuracies is discussed. Overall instrument accuracy is estimated to range between 9 and 15%.

**Key word:** Snow Water Equivalent, electromagnetic wave sensors, Cosmic Ray Neutron Probe, Gamma Ray Monitoring, frequency-modulated continuous-wave radar, Global Navigation Satellite System, sensor performance review

### 1. Introduction

Snow cover on the ground plays an important role in the climate system due to its high albedo, heat insulation that affects the ground thermal regime, and its contribution to snow runoff and soil moisture. The snow water equivalent (SWE, its mass per unit area,  $\text{kg m}^{-2}$ , or in  $\text{mm}$ ) is an Essential Climate Variable (ECV) for monitoring climate change, as recognized by the Global Climate Observing System (GCOS, WMO-UN\_E), in line with the WMO-Global Cryosphere Watch Initiative (Key et al., 2015; <https://globalcryospherewatch.org>). SWE monitoring is also of primary importance for hydrological forecasting and to prevent flooding risks over snowmelt-dominated basins

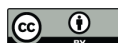

in mountainous and cold climate regions. The distribution of snow stations is generally sparse in high latitude regions, remote areas and high mountains (Bormann et al., 2013; Global Cryosphere Watch, 2015; Key et al., 2015; Pirazzini et al., 2018; Brown et al., 2019, 2021; Royer et al., 2021), given that monitoring is generally based upon expensive and occasional (weekly to monthly) manual sampling. The automation of manual survey networks is an essential medium-term prospect, especially since reliable and automatic instrument alternatives exist (Dong, 2018; Brown et al., 2021).

Various in situ field devices and approaches for measuring the temporal dynamics of SWE are available, all of which have their strengths and limitations (see the review by Rasmussen et al., 2012; Kinar and Pomeroy, 2015; Pirazzini et al., 2018). Some are invasive (i.e., destroying the snowpack or changing its properties), while others that are based on different remotely sensed approaches are non-invasive. Here, we focus on a new generation of electromagnetic wave-based field sensors that directly measure SWE, i.e., measuring a signal that is proportional to the snow mass per unit area. In this study, we do not consider indirect approaches, such as those that are based on snow depth monitoring, combined with snow density model evolution (Yao et al., 2018). We also do not consider satellite-based approaches.

The objective of this paper, therefore, is to present a performance review of four selected non-invasive sensors (Table 1), viz., the Cosmic Ray Neutron Probe (CNRP), the Gamma Ray Monitoring (GMON) scintillator, frequency-modulated continuous-wave radar (FMCW-Radar) and Global Navigation Satellite System (GNSS) receivers. All four approaches have common features: relatively low cost; low power; providing continuous and autonomous SWE measurements; and deployable in remote areas. Surface-based radar scatterometers and microwave radiometers have not been considered in this study because 1) they are still in early stages of development or are currently not operational, and 2) they have heavy maintenance demands (not autonomous) and are relatively expensive. These include, for example, scatterometers (Werner et al., 2010; Wiesmann et al., 2010; King et al., 2015; Werner et al., 2019), microwave radiometers (Langlois, 2015; Roy et al., 2016, 2017; Wiesmann et al., 2021); radar interferometers (Werner et al., 2010; Leinss et al., 2015; Pieraccini and Miccinesi, 2019; GPRI brochure, 2021), and Stepped-Frequency Continuous Wave Radar (SFCW) instruments (Alonso et al., 2021).

Sect. 2 provides background information on the basic principles of each of the four sensors that are presented in Table 1. Examples of SWE temporal series comparisons from the four different instruments are given in Sect. 3, permitting an evaluation of the performance of each system, including accuracy analysis. Advantages and drawbacks of these sensors are then discussed in Sect. 4.

## 2. Electromagnetic wave-based SWE sensor review

The main characteristics of the four reviewed sensors are summarized in Table 1, with the acronym that is used to denote them, together with their commercial names. There are two operation modes for the Cosmic Ray Neutron Probe (CNRP); thus, five cases were

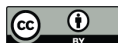

considered. All of these sensors allow quasi-continuous measurements throughout the winter without maintenance, and are powered by solar panels and batteries. The measuring principles of each of the instruments are illustrated in Fig. 1 and shown in Fig. 2. In this section, we only recall the main principle of functioning and the key elements of SWE retrieval, given that all sensors are well described in detail in the cited references.

*Table 1. SWE sensors that were studied and acronyms that were used. FMCW: frequency-modulated continuous-wave radar; GNSS: Global Navigation Satellite System, including GPS (USA), GLONASS (Russia), Galileo (Europe) and Beidou (China) satellite constellations. The frequency (Freq.) of the electromagnetic wave that was used and their approximate maximum Snow Water Equivalent ( $SWE_{max}$ ) measurement limit capabilities are given. See Fig. 1 for experimental settings and Fig. 2 for photos.*

| Sensor                                       | Acronym    | Approach                          | Freq. GHz                                    | $SWE_{max}$ (mm) | Comments                                                       | Commercial Name            | Main recent references                                                                                                                  |
|----------------------------------------------|------------|-----------------------------------|----------------------------------------------|------------------|----------------------------------------------------------------|----------------------------|-----------------------------------------------------------------------------------------------------------------------------------------|
| Cosmic Ray Neutron Probe                     | CRNP       | Sensor beneath snowpack           | $10^{23}$                                    | >2000            | Measures total snow, ice and water amount                      | SnowFox NRC EDF-Fr         | <a href="https://hydroinnova.com">https://hydroinnova.com</a><br>Gottardi et al., 2013                                                  |
|                                              |            | Sensor above snowpack             |                                              | ~ 150-300        |                                                                | Hydroinnova CRS-1000/B     | <a href="https://hydroinnova.com">https://hydroinnova.com</a><br>Bogena et al., 2020                                                    |
| Gamma Ray scintillator                       | GMON       | Sensor above snowpack             | $3.53 \cdot 10^{11}$<br>$6.31 \cdot 10^{11}$ | ~ 800            | Measures total snow, ice and water amount                      | CS725 Campbell Sci.        | Choquette et al., 2013<br>Smith et al., 2017<br><a href="http://www.campbellsci.ca">http://www.campbellsci.ca</a>                       |
| Frequency-modulated continuous-wave Radar    | FMCW-Radar | Active sensor above snowpack      | 24                                           | ~1000            | Requires snow depth measurements<br>Also measures stratigraphy | Sentire™ sR-1200 IMST Inc. | Pomerleau et al., 2020<br><a href="https://shop.imst.de">https://shop.imst.de</a>                                                       |
| Global Navigation Satellite System receivers | GNSSR      | 2 antennas above/beneath snowpack | 1.575 - 1.609                                | >1500            | Measures also Snow depth and Liquid Water Content              | SnowSense                  | Henkel et al., 2019<br>Koch et al., 2020<br><a href="https://www.vista-geo.de/en/snowsense/">https://www.vista-geo.de/en/snowsense/</a> |

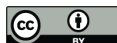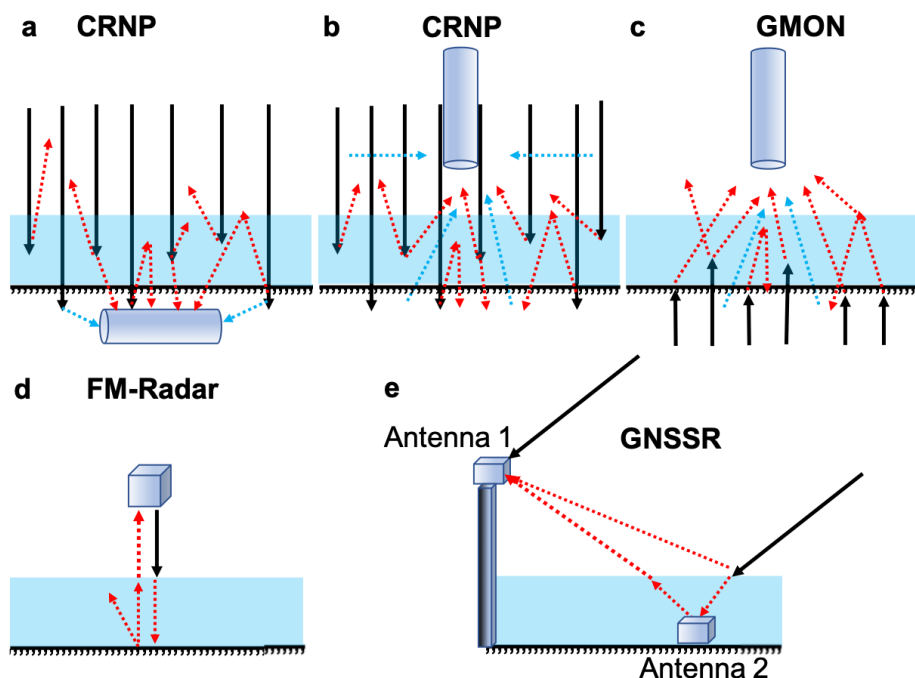

Figure 1 Diagram of electromagnetic ray paths for the four SWE sensors (see Table 1). In all figures, black arrows correspond to natural or emitted electromagnetic signals and dotted red arrows to rays interacting with snow (the lower the signal reaching the sensor, the higher the SWE). **a)** Cosmic Ray Neutron Probe (CNRP) below the snow, buried in the ground. In this case, black arrows are ambient neutrons generated primarily by interactions of secondary cosmic ray neutrons with terrestrial and atmospheric nuclei. Dotted red arrows are neutrons interacting with snow, which decrease when SWE increases. Dotted blue arrows are neutrons interacting with soil moisture. **b)** CNRP above the snow, looking downward. Same as (a) for the arrow meanings, but dotted blue arrows are neutrons interacting with soil and atmospheric moisture. **c)** Gamma Monitor (GMON) sensor. Same as (a) for the arrow meanings. **d)** Frequency-modulated continuous-wave radar (FMCW-Radar) looking downward above the snow. Black arrow is the radar-emitted wave at 24 GHz. **e)** Global Navigation Satellite System (GNSS) Receivers. The two antennas receive signals emitted by all of the GNSS satellites in the antennas' field of view and at all incidence angles (only one ray at one angle is shown).

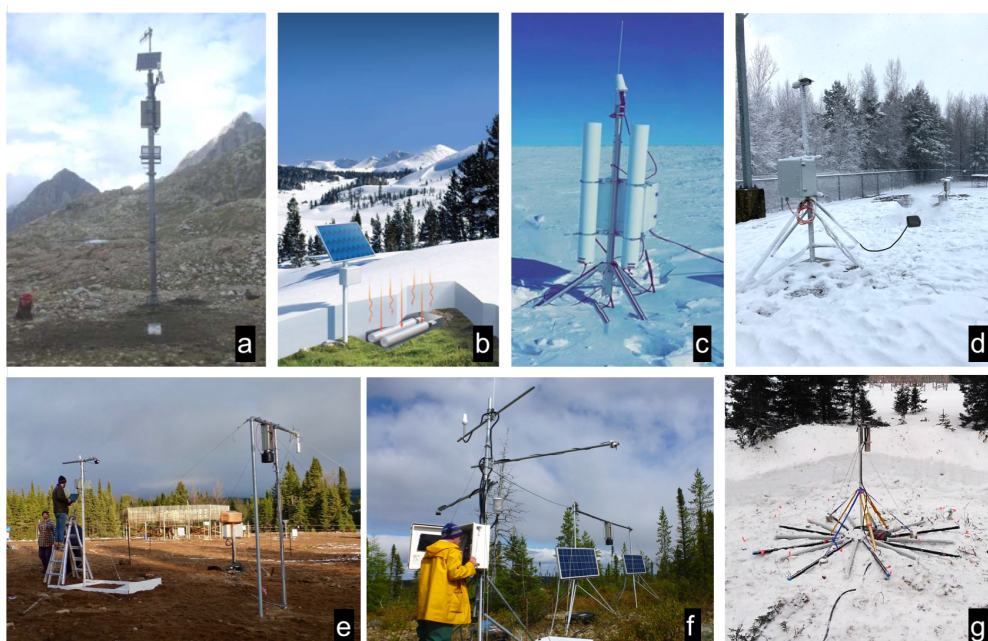

121

122 Figure 2. Photographs of sensors that were analyzed. **a)** Cosmic Ray Neutron Probe (CNRP) from the EDF  
 123 French network (Nivomètre à Rayon Cosmic, NRC) at Spiejeoles, French Pyrénées. One can see the neutron  
 124 probe buried in the ground (sensor composed of two neutron detector tubes filled with Helium 3 ( $^3\text{He}$ ) and  
 125 placed at 3.5 m from a 6 m mast, which carries the ancillary sensors (atmospheric pressure, temperature,  
 126 snow height, wind, liquid precipitation). Credit: Gottardi et al. (2013). **b)** SnowFox CNRP set at ground level  
 127 beneath the snow cover. The system is composed of two detector tubes filled with  $^{10}\text{BF}_3$ ; one is sensitive to  
 128 neutrons with a maximum energy of  $\sim 0.025$  eV, whereas the second is sensitive to moderated energy  
 129 neutrons from  $\sim 0.2$  eV to 100 keV. Similar to (a), the system requires measurements of atmospheric  
 130 conditions (atmospheric pressure, temperature and humidity). Credit: Hydroinnova SnowFox manual. **c)**  
 131 Same sensor as in (b), but the Hydroinnova CRS-1000/B sensor is placed above the snow, measuring the  
 132 ambient and upward neutron counts, with the latter being attenuated by the snowpack. Crédit: Philip  
 133 Marsh, Wilfrid Laurier University, Waterloo, ON, Canada; sensor in the tundra at Trail Valley Creek, Changing  
 134 Cold Regions Network <http://ccrnetwork.ca>. **d)** GNSSR installed at the Université de Sherbrooke SIRENE  
 135 site. The antenna that was placed on the ground (beneath the snow) was made visible at 3 m from the mast,  
 136 on top of which a second antenna was affixed. Credits: Alain Royer. **e)** The FMCW-Radar (on the left) and  
 137 the GMON (on the right) at the NEIGE-Forêt Montmorency site. The housing of the IMST sentire™ FMCW-  
 138 Radar module is compact (114.0 mm  $\times$  87.0 mm  $\times$  42.5 mm) and weighs 280 g. A metallic plate on the  
 139 ground in the field-of-view of the radar substantially increases radar echoes. The GMON is a tube 62 cm  
 140 long, and 13 cm in diameter, weighing 9 kg. In the background of photo e, one can see the solid precipitation  
 141 gauge, which is known as the Double Fence Intercomparison Reference (DFIR). Credits: Alain Royer. **f)**  
 142 Meteorological and snow (GMON) automatic station at the LeMoyne James-Bay, Québec, Canada site in a  
 143 sub-arctic environment (Prince et al., 2019). Credits: Alain Royer. **g)** The GMON at the NEIGE-Forêt  
 144 Montmorency site set up to boost  $^{40}\text{K}$  counts with pipes filled with potassium fertilizer. Credit: Sylvain  
 145 Jutras.

## 146 2.1 Cosmic Ray Neutron probe (CRNP)

147 CRNP measurement is based on the moderation of ambient neutrons by hydrogen in  
 148 water, snow and ice. The intensity of natural low-energy cosmic ray neutron emission is



inversely correlated with the amount of hydrogen in the soil (Zreda et al. 2008; Andreasen et al., 2017) or snow cover (Desilets et al. 2010; Gottardi et al., 2013; Sigouin and Si, 2016; Bogena et al., 2020). Even though the principle of this approach has been known since the 1970s, it attained a level of operational maturity in the 2000s, especially with the use of commercialized soil moisture probes. Électricité de France (EDF) successfully used a network of cosmic-ray probes (detector based on a Helium counter) that were buried under the snowpack to measure SWE for more than a decade in the French Alps and in the Pyrenees (Fig. 2a) (Paquet and Laval, 2006; Paquet et al., 2008; Gottardi et al., 2013).

There are two experimental approaches for CNRP-based SWE monitoring (Fig. 1a,b), i.e., 1) with the probe at the ground level beneath the snow (Figs. 1a, 2b, such as the SnowFox sensor), or 2) with the probe placed a few meters above the snow surface (Fig. 1b), such as the one proposed by Hydroinnova (Fig. 2c) (CRS-1000/B, Hydroinnova, Albuquerque, NM, USA; [http://hydroinnova.com/snow\\_water.html](http://hydroinnova.com/snow_water.html)). Using a dual-channel (fast and slow neutrons) cosmic ray probe above the snowpack (Fig. 1b) is an attractive SWE measurement tool because it can provide direct estimates of SWE within a 20 to 40 ha footprint (20 ha corresponds to a circle of 252 m radius) (Desilets and Zreda, 2013; Schattan et al., 2017). In contrast, the footprint of a probe that is installed under the snow is limited to a spot measurement above the sensor (Fig. 1a). While approach (1a) permits measurements of very thick snow cover (> 1000 mm SWE), the drawback of approach (1b) is that it is limited to low SWE measurements (typically < 150 mm SWE) over homogeneous flat terrain. However, In the Austrian Alps, contrary to previous studies, Schattan et al. claim not to have measured saturation for a snowpack of the order of 600 mm SWE, over an estimated footprint with 230 m radius. Aspects that are related to the measurement scale of each sensor are critical to SWE measurements, since SWE is generally highly variable spatially, depending upon the ecosystem and terrain (Kinar and Pomeroy, 2015; Dong, 2018). These questions are discussed in Sect. 4.

The CRNP method requires creating a function for converting neutron counts to snow water equivalent (Paquet et al., 2008; Gottardi et al., 2013; Sigouin and Si, 2016; Andreasen et al., 2017; Schattan et al., 2017; Bogena et al., 2020). Desilets (2017) provides the calibration procedure in detail. Neutron counts must be accumulated over a specified period of time (e.g., from 6 h to 24 h). The CRNP method requires that the counting rate must first be known (calibrated) and that disturbance effects on measured cosmic rays at the site location have to be taken into account. Disturbance effects that need to be corrected include temporal variations in the natural cosmic-ray flux and variations in air pressure and atmospheric water vapor on site measurements during the count time. Temporal variation in cosmic-ray flux can be determined from the NMDB database (Real-Time Database for high-resolution Neutron Monitor measurements; [www.nmdb.eu](http://www.nmdb.eu)), thereby providing access to reference neutron monitor measurements from stations around the world. Corrections for air pressure (linked to the altitude of the station) and atmospheric water vapor variations require ancillary standard meteorological sensors, which measure atmospheric pressure, air temperature and relative humidity.





While accuracy losses that are linked to atmospheric disturbances (pressure and humidity corrections) are relatively weak (a few percent), this is not the case for primary variations in the natural cosmic-ray flux (Andreasen et al., 2017), which may drastically change the results of SWE estimation. This flux can vary up to 30% over long periods (weeks to months), thereby causing errors up to 50% in SWE estimates when they are not considered (Paquet and Laval, 2006). Therefore, it is important to correct the measured signal using the closest world reference station in the vicinity of the measurement site. If not available, a second cosmic-ray sensor is required to produce accurate SWE estimates using normalized signals (above and beneath snow).

In the case of the second approach, where the probe is installed above the ground surface (Fig. 1b), the probe must be calibrated for soil moisture. If soil moisture correction is not applied on the winter signal measurements, retrieved SWE values will be systematically overestimated. This bias can be corrected using measurements of CRNP signal without snow, just prior to snowfall. We must either assume that soil moisture levels remain stable throughout the winter, which is generally the case when soil remains frozen, or apply a correction based on soil moisture conditions that are otherwise known.

## 2.2 Gamma Ray scintillator (GMON)

Monitoring snow water equivalent by using natural soil radioactivity is a well-known approach (Bissell and Peck, 1973). Since 1980, an airborne snow survey program using this technology has successfully collected areal mean SWE data for operational flood forecasting over the whole northwestern North America, including Rocky Mountains, Alaska and Great Plains (National Operational Hydrologic Remote Sensing Center, <https://www.noahrs.noaa.gov/snows survey/>). The mean areal SWE value is based on the difference between gamma radiation measurements over bare ground and snow-covered ground, the latter being attenuated by the snowpack (Carroll, 2001).

The principle of SWE measurements that are based on the Gamma Monitor (GMON) ray scintillator is the absorption by the water, regardless of its phase (liquid, snow or ice), of the natural radioactive emission of Potassium-40 ( $^{40}\text{K}$ ) from soils (Ducharme et al., 2015). This naturally occurring radioactive isotope of potassium has a gamma emission of 1.46 MeV. The GMON probe that is manufactured by Campbell Scientific (Canada) (CS7525; <http://www.campbellsci.ca/cs725>) also measures the emission of Thallium-208 ( $^{208}\text{Tl}$ ), which emits gamma rays at a slightly higher energy (2.61 MeV) that originate from the decay of Thorium 232 (Choquette et al., 2013; Wright, 2013; Stranden et al., 2015). Both of these elements are common to almost all types of surfaces, regardless of whether these are organic or non-organic soils. However, we observed that the isotope associated with the higher count (i.e.,  $^{40}\text{K}$ ) is generally the most reliable.

The experimental set-up, which is illustrated in Fig. 1c, is based on the initial, snow-free measurement of the number of counts for  $^{40}\text{K}$  or  $^{208}\text{Tl}$  per period of time, which would be later decreased by the presence of the snowpack. Typically, 300 000 and 60 000 counts per 24 hours for  $^{40}\text{K}$  and  $^{208}\text{Tl}$ , respectively, are suggested as minimal values to provide



accurate SWE measurements (CS725 Snow Water Equivalent Instruction Manual, 2017, Campbell Scientific [Canada] Corporation, Edmonton, AB; [https://s.campbellsci.com/documents/ca/manuals/cs725\\_man.pdf](https://s.campbellsci.com/documents/ca/manuals/cs725_man.pdf)). The observed rate of soil emission at each site allows the operator to define the minimum sampling time frequency. Seeding experiments conducted using potassium fertilizer show potential for increasing potassium counts that are measured by the CS725 by up to 80% at sites where low counts are found (Wright et al., 2011). As is the case for ground-pointing CRNP, measuring the base-line signal of the electromagnetic energy emanating from the ground prior to the first snowfall is a critical step in signal processing, given that it also depends upon soil moisture (SM) during the winter and spring periods. SM attenuates the natural dry-ground emission, resulting in an overestimate of SWE during signal processing when SM increases. Based upon 10+ years of experience with a large GMON network that is deployed in Quebec, Canada, it has been shown that in most cases, SM does not vary substantially during the winter season. It can be considered constant, thereby simplifying mathematical equations used in calculating SWE (Choquette et al., 2013; Ducharme et al., 2015).

The CS725-Campbell GMON sensor has been the subject of a detailed performance analysis within the framework of the WMO Solid Precipitation Intercomparison Experiment-SPIICE (Smith et al., 2017). Moreover, since the device is sensitive to water contained in soils, it can be successfully used to estimate soil moisture during snow-free seasons. An operational GMON network, with a sampling frequency of 6 h, is actually deployed across the southern part of Québec and Labrador, northeastern Canada (45–55°N); it accounts for 114 stations in operation that are dedicated to water resource forecasting (Alexandre Vidal, Hydro-Québec, personal communication, November 2020). Also, these continuous measurements from the GMON Quebec network are demonstrably very useful for validating the assimilation of microwave observations into a snow model (Larue et al., 2018). Recently, GMON has also demonstrated its robustness in a research project on seasonal snow monitoring from a station that was installed at 4962 m asl in the Nepalese Himalayas (Langtang Valley) to quantify the evolution of SWE (Kirkham et al., 2019).

### 2.3 FMCW radar (FMCW-Radar)

The principle of frequency-modulated continuous-wave (FMCW) radar has been well known since the 1970s (see the review by Peng and Li, 2019 and by Pomerleau et al., 2020) and has been popularized for snow studies since Koh et al. (1996), Marshall et al. (2005), and Marshall and Koh (2008), among others, were published. FMCW-Radar is an active system design for distance measurements. The radar emits a wave at variable frequencies that are centered on a reference frequency. When the radar receives a return from a target, the frequency difference between the emitted and reflected signals is measured (Fig. 1d). Since the frequency change rate is known, the time between the emission and the reception of the echo can be measured from which the radar–target distance is calculated.





The principle of SWE retrieval is based on the time measurement of wave propagation in the snowpack that is proportional to the snow refractive index (square of permittivity), which changes the wave-speed propagation. As the refractive index of snow can be linked to its density (Tiuri et al., 1984; Mätzler, 1986; Pomerleau et al., 2020), SWE can be retrieved knowing the snow depth. The experimental set-up is shown in Fig. 1d and illustrated in Fig. 2e.

Two main FMCW radar specifications are required for SWE measurement: the radar central frequency and its bandwidth that is scanned. The central frequency specifies three parameters: a) the loss in signal strength of an electromagnetic wave that would result from a line-of-sight path through free space (the higher the frequency, the greater the loss); b) its penetration depth (the higher the frequency, the less penetration power it has); and c) its sensitivity to liquid water content in the snowpack. The bandwidth specifies the distance resolution and, thus, the precision: the wider the bandwidth, the lower the resolution. There is negligible frequency dependency of the snow refractive index ( $n'$ ), which governs wave propagation in the snowpack. The refractive index ( $n'$ ) is linked to snow density ( $\rho$ ) by a linear relationship:  $n' = 8.6148 \cdot 10^{-04} \rho + 9.7949 \cdot 10^{-01}$  (Pomerleau et al., 2020).

For snow studies, several FMCW radars with different frequencies and resolutions are used, such as those common at the X-band (10 GHz), operating over 8–12 GHz (Ellerbruch and Boyne, 1980; Marshall and Koh, 2008). They provide a vertical resolution on the order of 3 cm. In contrast, L-Band FMCW radar (1.12–1.76 GHz) allows greater penetration but suffers from reduced vertical resolution (Yankielun et al., 2004). Multiband band FMCW radar have also been developed (Rodriguez-Morales et al., 2014), such as an L/C-band (2–8 GHz) that was used to successfully retrieve snow depth (Fujino et al., 1985), a C/Ku (8–18 GHz) large wideband FMCW radar that is capable of detecting crusts as thin as 0.2 mm within the snowpack (Marshall and Koh, 2005), or the improved (C-, X-, and Ka-band) radar (Koh et al., 1996). Operating frequencies of commercial, low-cost radar systems, such as those that are adopted for automotive radar systems (Schneider, 2005), are now available for K-band (24 GHz) and W-band (77 GHz) applications.

The availability of such new types of lightweight and very compact 24-GHz FMCW radar systems has motivated our research group to assess their ability to monitor the SWE continuously and autonomously (Fig. 2e) (Pomerleau et al., 2020). The FMCW-Radar that is used is centered on 24 GHz (K-band), scanning over (23–25.5 GHz), i.e., with a bandwidth of 2.5 GHz that provides a resolution of 6 cm in the air (IMST sentire™, IMST, Kamp-Lintfort, Germany; <http://www.radar-sensor.com/>). These specifications appear to be a good compromise between penetration and resolution capabilities for SWE estimation, while keeping the sensor affordable, light and compact, with low power consumption. The radar penetration depth ( $\delta Pr$ ) of dry snow significantly decreases with density following a power law, which varies with temperature (see Fig. A2, Pomerleau et al., 2020). At  $T = 0^\circ\text{C}$ ,  $\delta Pr$  decreases from 6.78 to 4.81, 3.26 and 2.05 m for respective snow densities of 150, 200, 275 and 400  $\text{kg m}^{-3}$  (Pomerleau et al., 2020). Wet snow



drastically reduces  $\delta Pr$ , given that liquid water strongly absorbs the radar signal, leading to high reflectivity at the air/wet snow interface and weak transmissivity. For example, the two-way radar penetration depth decreases abruptly from 2 m for dry snow at a density of  $400 \text{ kg m}^{-3}$  to 0.05 m for wet snow with 0.5% of liquid water content. It should be noted that this strong sensitivity to wet snow allows the radar to precisely detect the onset of snowpack melt, a benefit that is discussed in Sect. 4.

One of the main interests of this approach is its potential capacity to estimate SWE from a small remotely piloted aircraft (RPA). Over the Arctic, snow cover that can be characterized by a two-layer snowpack structure, and assumptions can be made on its mean refractive index, thereby allowing bulk SWE to be estimated (work in progress). Hu et al. (2019) also showed the usefulness of imaging FMCW synthetic aperture radar onboard the RPA. Several studies have also shown the potential of FMCW radar for different applications, such as avalanche studies (Vriend et al., 2013; Okorn et al., 2014; Laliberté et al., 2021), snow stratigraphy based on successive FMCW echo analyses (Marshall and Koh, 2005; Marshall et al., 2007), snowpack tomography (Xu et al., 2018), and ice thickness monitoring (Yankielun et al., 1993; Gunn et al., 2015). Pomerleau et al. (2020) obtained highly accurate measurements of lake ice thickness using the 24 GHz FMCW radar, with a root-mean-square difference (RMSD) of 2 cm accuracy up to  $\approx 1$  m ice thickness (derived from 35 manual in situ measurements).

#### 2.4 GNSS receivers (GNSSR)

The principle of SWE retrieval based on Global Navigation Satellite System (GNSS) receivers is to use the signals that are emitted by the GNSS satellite constellations, and relate the carrier phase change that is induced by the delay caused by the snowpack at ground level. With two static receivers (standard GNSS antennas), i.e., one placed under the snow and the other above the snow, both signals that are measured under dry-snow conditions can be compared and SWE derived (Fig. 1e) (Henkel et al., 2018). Comparing GNSS signal attenuation measurements between the two antennas (below and above the snowpack) also permits the retrieval of Liquid Water Content (LWC) of the wet snow (Koch et al., 2019).

This relatively recent and novel approach has been validated (Koch et al., 2019; Apple et al., 2020) and is now commercialized by VISTA Remote Sensing in Geosciences GmbH, Munich, Germany (SnowSense®, <https://www.vista-geo.de/en/snowsense/>). Snow depth retrieval was made operational since a longer time that is based on interferometric reflectometry of GNSS signals became available (see Larson et al. 2009; Larson, 2016). GNSSR satellites operate at 1.575 and 1.609 GHz. The experimental set-up is described in Fig. 1e, based on a low cost and lightweight system. In this study, we used the SnowSense system for monitoring SWE and LWC throughout a winter, together with other sensors (see Results Sect. 3). Our own system is shown in Fig. 2d.

Another promising way to monitor SWE, which is based on the same principle of GNSS, is the use of powerful satellite transmissions as illumination sources for bistatic radar. This



so-called “Signals-of-opportunity (SoOp)” approach covers a wide range of frequencies, such as emissions from United States Navy Ultra High Frequency (UHF) Follow-On (UFO) communication satellites in P-Band frequencies (between 240-270 MHz). From two P-band antennas (one direct and one reflected), Shah et al. (2017) demonstrated the feasibility of retrieving SWE using the phase change in reflected waveforms, which is linearly related to the change in SWE. These methods were not included in this review since they are still in the development stage and not sufficiently mature to be operational.

### 3. Results: examples of comparisons

Continuous and simultaneous recordings of the different instruments on the same site were conducted to analyze their behavior in terms of their temporal evolution. In situ measurements were also used to compare the data between them. From these data, which were completed by a literature review of experiments using these same instruments, estimates of their respective accuracies are discussed (Sect. 3.4).

#### 3.1 Experimental sites and validation measurements

We compared the four instruments at two snow research stations that were located in Québec (Canada). The first was the SIRENE site (Site Interdisciplinaire de Recherche en ENvironnement Extérieur), which is situated on the main campus of the Université de Sherbrooke in a temperate forest environment (45.37°N, -71.92°W, 250 m asl) (Fig. 2d). The second site is the NEIGE-Forêt Montmorency (NEIGE-FM) research station. The instruments were located in an open area (Fig. 2e) of the Montmorency experimental forest (47.32° N; -71.15° W, 640 m asl) of Université Laval (Quebec City), which is in the boreal forest. The NEIGE-FM snow research station is part of the World Meteorological Organization (WMO) Global Cryosphere Watch (GCW) Surface Network CryoNet (WMO ID: 71212) (WMO, 2015).

Two methods were used to obtain in situ manual SWE measurements in the vicinity of the four SWE-systems: the snowpit (SP) approach; and snow-tube core samplers (see Kinar and Pomeroy, 2015). The SP-based SWE values (in mm = kg m<sup>-2</sup>) were derived from vertical continuous density profiles, which were determined by weighing snow samples at a vertical resolution of 5 cm (height of the density cutter). Assuming an accuracy of density cutter measurements of about 9% (Proksch et al., 2016), the mean relative SWE accuracy can be estimated to be of 10–12%. SWE estimates were also obtained by weighing the extracted core sample of known diameter (Ø) and length using a coring tube. In this study, the core sampling was performed using three different snow tube models, which were averaged: “Carpenter” (Federal standard sampler, 3.7 cm Ø tube), the Hydro-Quebec snow tube (12.07 cm Ø), and an in-house Université Laval snow tube (15.24 cm Ø). The accuracy of tube core sampling that we carried out on snowpack up to 600 mm SWE with large tubes is of the order of 6% (Brown et al., 2019). Such accuracy is difficult to define, as discussed in Sect. 3.4. Furthermore, as manual measurements



cannot be taken at the same location during a given winter period, this could generate uncertainty when compared to a fixed instrument, due to small-scale spatial variability of SWE and surface roughness.

The snowpack properties were derived continuously from GMON and CRNP systems throughout the entire winter season of 2008-2009 (Fig. 3) and from GMON, FMCW-Radar and GNSSR systems in 2017-2018 (Fig. 4). In addition to SWE measurements, continuous automatic snow depth measurements were performed using an acoustic sensor (Campbell Scientific, SR50AT-L), and manually with a graduated probe around the sampling sites. LWC measurements were derived from GNSSR (Fig. 4). Air temperature (T) at 2 m height and total daily cumulated precipitation (Global Water tipping bucket rain gauge) were recorded at the SIRENE site; a threshold of  $T = 0^{\circ}\text{C}$  was used to separate solid and liquid phases (Fig. 3). In this section, we present comparisons between these sensors with in situ validation data measured as close as possible to the automatic instruments, and their accuracy, which was also based on literature values and other measurements that we carried out (not shown), is analyzed in Table 2.

### 3.2 Comparison of GMON- and CRNP-derived SWE seasonal evolution

Figure 3 shows the SWE evolution of a shallow snowpack (maximum snow depth of 56 cm) at the SIRENE site that was derived from GMON and CRNP sensors throughout the winter season of 2008-2009. The CNR probe that was used was the same as the French EDF probe placed on the ground (Paquet et al., 2008) and installed at about 5 m distance from the GMON footprint. The CNRP counts were accumulated over 1 hour and normalized by an identical probe that was installed nearby just above the snow surface. The GMON counts were accumulated over 6 hours, and only  $^{40}\text{K}$  counts were considered (TI counts were similar, but not shown). The GMON sensor, which was installed on a 2 m mast above the surface, was calibrated to take into account the soil moisture prior to snowfall accumulation. In Fig. 3, we have plotted daily mean values of the CRNP and GMON data. In situ measurements were derived from snowpit measurements that were taken around these two instruments at a maximum radius of 20 m.

Results show that GMON and CRNP evolve similarly over the winter, with GMON SWE being slightly higher after the first winter month ( $\text{SWE} > 50\text{ mm}$ ). This difference occurred after a pronounced melting spell (29-30 December 2008) and is explained by the water that has accumulated on the ground under the GMON and not on the CNRP. The moisture beneath the GMON formed a significant ice layer that lasted all winter. Precipitation (snowfall and rain) is also plotted, showing how GMON and CNRP develop with each event. For that given winter, rain-on-snow events were frequent, leading to moisture accumulation on the ground. Note also that at the end of the winter, there was ice that had not yet melted and water accumulation under the GMON, leading to a significant overestimation of GMON SWE when there was no more snow on the ground after March 20, 2009. The accuracy measurements are discussed in Sect. 4.2.

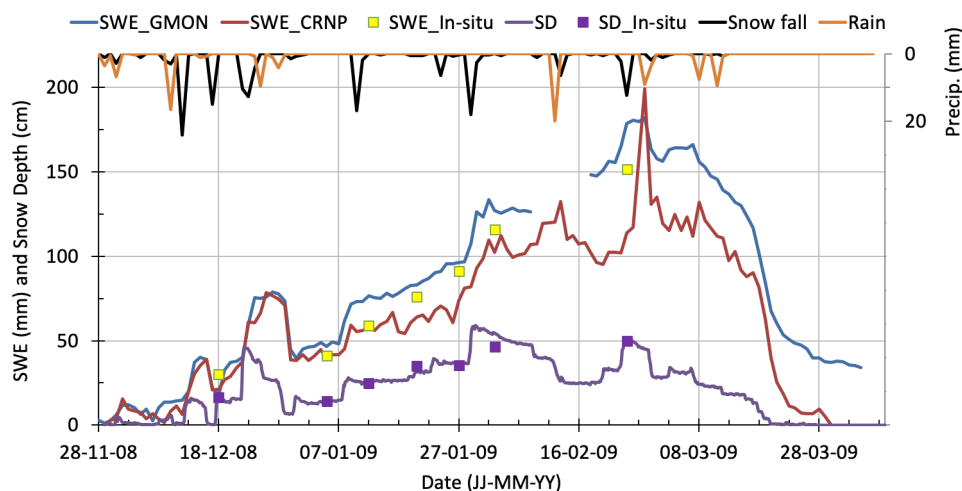

Figure 3. GMON- and CRNP-derived snow water equivalent (SWE, mm), snow depth (SD, cm), and recorded daily solid and liquid precipitation (Precip., mm, right hand scale), in comparison to validation data (in situ) at the SIRENE site for the winter season of 2008-2009. Continuous SD measurements (purple line) are from SR-50 and SD\_in situ measurements (purple square) are from snowpits. Open yellow squares correspond to manual in situ SWE measurements.

### 3.3 Comparison of GMON-, Radar- and GNSSR-derived SWE seasonal evolution

Figure 4 shows the SWE evolution that was measured by the three instruments, i.e., GMON ( $^{40}\text{K}$  counts only), FMCW-Radar and GNSSR, which had been placed in close proximity to one another at the NEIGE-FM research station for the winter season of 2017-2018. Snow depth was monitored up to 120 cm, corresponding to 500 mm SWE maximum at the end of April.

The three instruments were compared to manual in situ measurements that had been derived from SP (red squares) and core (red triangles) approaches in Fig. 4. We distinguished the two methods (SP and snow tube) because they exhibit significant differences, with a RMSD of 33 mm (12%). These discrepancies are the result of two problems: 1) SWE spatial variability; and 2) the method that was used, since the design of snow tubes and cutters has some influence on sampling errors and bias (Goodison et al., 1987). Therefore, accuracy analyses (Sect. 3.4) were performed considering manual SP as the reference because the SP approach was used for both experiments.

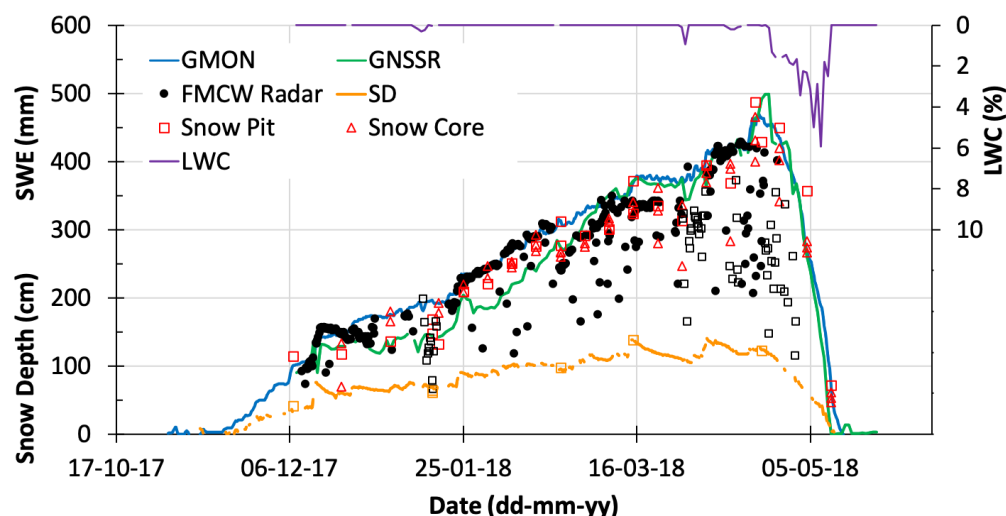

Figure 4. GMON- (blue line), FMCW Radar- (black closed circles) and GNSSR-derived (green line) snow water equivalent (SWE, mm), snow depth (orange line for SR50AT-L data and orange open squares for in situ data) (SD, cm) and GNSSR-derived Liquid Water Content (LWC, % volumetric, purple line, right scale), in comparison to in situ snowpit (open red square) and snow core (open red triangle) SWE measurements at the NEIGE-FM site for the winter season of 2017-2018. For FMCW-Radar data (in black), plain circles are for dry snow, while open squares correspond to wet snow from air temperature measurements.

The continuous simultaneous recordings from the different instruments permit temporal evolution analysis (Fig. 4). While GMON SWE values regularly increase up to 465 mm on 19 April 2018, the FMCW-Radar data appears noisier and must be smoothed to eliminate outliers that show underestimated SWE values. These points are mainly due to incorrect detection of the peak of the radar echo on the ground (snow-ground interface), sometimes with low amplitude, and which can be filtered with improved data quality processing of raw recording (Pomerleau et al., 2020). In particular, all data acquired under wet snow conditions (open black squares, Fig. 4) are obviously underestimated as expected, because of radar wave absorption by liquid water in the snowpack. Compared to the GMON, the GNSSR signal increases with values lower than the GMON until the mid-March and continue to evolve with similar absolute values until the SWE<sub>max</sub> was reached on 23 April 2018 with a SWE value of 499 mm. The behavior of the three instruments, showing slightly different patterns of snow evolution, remains always close to in situ observations. It should be noted that in Fig. 4, there is a small difference (+4 days) between the end of snow cover that was recorded with GNSSR (11 May 2018) compared to GMON (14 May 2018). The GNSSR sensor is not sensitive to soil moisture, while GMON is, despite the instruments being located on a well-drained sandy site (NEIGE-FM site). In the case shown here, the end of snowmelt is well captured by both instruments. The





accuracy between instruments is analyzed in Sect. 3.4, including a second winter season of continuous measurements at the NEIGE-FM site (2016-2017, Pomerleau et al., 2020).

GNSSR also measures the Liquid Water Content (LWC) of snow (purple line in Fig. 4). The non-zero LWC values correspond well to positive air temperatures that were recorded at this site, and also to the drop in FM-Radar measurements (open black squares).

### 3.4 Accuracy analysis

It is challenging to compare the accuracy of several instruments, given that there is no absolute reference for estimating SWE (see Kinar and Pomeroy, 2015). In situ manual measurements are themselves subject to error, with varying precision depending upon the method that is being used. Errors are incurred that depend upon the types of density cutter, tube diameter, sampling quality that is operator dependent, and ice lenses in the snowpack, among other sources. This is a long-debated topic, with no actual established international standard protocol (Work et al., 1965; Goodison et al., 1981, 1987; Kinar and Pomeroy, 2015). For example, the standard protocol from Environment and Climate Change Canada is to attain five to ten measurements along a pre-determined survey line of about 150 to 300 m using a translucent plastic ESC-30 sampler (6.2 cm  $\emptyset$ , which is commonly employed in Canada) (Brown et al., 2019). The accuracy of the tube core sampler for medium snowpack (up to  $\sim 600$  mm SWE) and with large tubes ( $\emptyset \sim > 6$  cm) is about 6%; for higher SWE requiring smaller diameter tubes, it is around 10% (Work et al., 1965; Goodison et al., 1987; Dixon and Boon, 2012; Brown et al., 2019). Moreover, because manual measurements cannot be taken at the same location during a given winter period, uncertainty can be introduced by well-known local SWE spatial variability that can occur at fine scales around the sensors. Such variability depends upon several factors, such as the region and the environment (Arctic area, aspect and slope in mountainous areas, for example), the micro-topography and roughness, the vegetation, and snow redistribution by the wind (Clark et al., 2011; Bormann et al., 2013; Rutter et al., 2014; Meloche et al., 2021; Royer et al., 2021). Furthermore, temporal variability of snowpack properties during the winter requires regular validation measurements throughout the season.

The sensor accuracies were evaluated from results that have been previously shown (Sect. 3.2 and 3.3) and from published studies at other experimental comparison sites. These other sites are: the Weissfluhjoch high-alpine site near Davos, Switzerland (46.83° N, 9.81° E, 2 536 m asl); Sodankylä, Finland (67.37° N, 26.63° E, 185 m asl); Caribou Creek, SK, Canada (53.95° N, -104.65°W, 519 m asl); and Fortress Mountain ski area, Kananaskis Country, Canadian Rocky Mountains, AB (50.82° N, -115.20° W, 2 330 m asl).

We also conducted a series of manually FMCW-radar measurements over dry snowpack and compared them with in situ SWE measurements over a wide range of conditions (snow depth and density) in boreal forest (47° N, 18 points), subarctic taiga (54–56° N, 32 points) and Arctic tundra (69° N, 28 points) environments along a northeastern Canadian transect (Pomerleau et al., 2020). The results are reported in Table 2.



Table 2 summarizes the accuracy of each instrument and protocol (five cases: CRNP in and above ground, GMON, FMCW-Radar and GNSSR) in relation to in situ manual measurements (snowpit method), and against snow pillow data that were considered as reference measurements by the authors of the publications consulted. Even if this mechanical method is well known and proven ~~for a long time~~, the snow pillow can sometimes generate large **uncertainties** when bridging processes occur that are linked to freeze–thaw cycles leading to disconnection of the weighing mechanism from the overlying snowpack (Kinar and Pomeroy, 2015). In Table 2, when known, the accuracy was defined by the root-mean-square difference (RMSD) between an instrument and a given reference, and by a linear regression that was defined by the coefficient of determination ( $R^2$ ), the slope and the intercept. The number of points is also given.

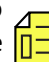

[Table 2 here](#)

The accuracy analysis does not allow us to determine the instrument that has the best accuracy, due to the diversity of experimental conditions, including the range of SWE, the number of experimental sites and point measurements, and analyses that are performed over one or several seasons. It appears that all of the five methods show remarkably good performance, with an average RMSD against in situ snowpit manual measurements on the order of  $33 \pm 11$  mm, over a range of 14 to 48 mm, i.e., about 12% of mean SWE (Table 2). The mean regression is also significantly high (mean  $R^2 = 0.92 \pm 0.07$ ). Calculated average slope is  $0.976 \pm 0.13$ , meaning that in general, the instruments slightly underestimate SWE for higher SWE values compared to in situ measurements, even if this is not always the case (Table 2). RMSD increases slightly when the analysis was performed over a deep snowpack (0 – 1 000 **mm**) and decreases when compared to another continuous instrument instead of in situ data (instrument vs GMON and instrument vs snow pillow, average RMSD =  $23 \pm 10$  mm, Table 2).

For the GNSSR instrument that allows the operator to differentiate dry from wet snow, Koch et al. (2020) have shown that SWE RMSD is about 2.4-fold higher for wet snow than for dry snow. They did not provide information on LWC uncertainty. In late winter 2021, for very wet melting snow, we did a validation measurement using the WISe A2 Photonic probe (snow liquid-water content sensor that is based on snow microwave permittivity measurements; <https://a2photonicsensors.com/wise/>). GNSSR and in situ LWC values were respectively 0.44 and 0.47 %, for respective SWE of 149 and 133 mm. The uncertainty in wet SWE retrieval could result from approximations of the wet snow refractive index that is used in the retrieval process, and which is very sensitive to LWC. This aspect could probably be addressed by **improved inversion**.

The accuracy comparison in Table 2 must be weighted according to the analysis conditions. The accuracy estimates can actually depend upon the number of points being used and their distribution over time. High inter-annual variability of the snowpack state (see Bormann et al., 2013; Lejeune et al., 2019) ideally would necessitate several years of measurements over the winter. The accuracies of each GMON and CNRP instrument were



derived from huge data sets that were based on operational networks from the GMON Hydro-Quebec network in Canada and the Alps' EDF network for the **CNRP**, respectively, with a very large number of samples taken over several years of experiments and from multiple sites. The accuracy of the GMON that is given by the manufacturer is  $\pm 15$  mm for  $SWE < 300$  mm and  $\pm 15\%$  for  $SWE$  of 300-600 mm, which is probably rather conservative. The accuracy of the SnowFox sensor (CRNP) that has been provided by the manufacturer (5-10%) must be confirmed. The GNSSR approach has recently been the subject of two different comparative analyses showing very promising results (Henkel et al., 2020; Koch et al., 2020), which were confirmed by our own results. Over a full season, we obtained an excellent relationship between GNSSR and in situ manual measurements ( $RMSD = 11\%$ , Table 2) and compared with GMON ( $RMSD = 34$  mm,  $12\%$ ,  $SWE_{GNSSR} = 1.126 SWE_{GMON} - 59.3$ ,  $R^2 = 0.97$ , 153 days).

#### 4. Strengths and Weaknesses of Instruments

In this section, we review the advantages and drawbacks of each of the instruments that are presented, summarized in Table 3. This analysis is based on our experience, on instrument and protocol performances (Sect. 3), and a literature review on experimental results of measurements that were carried out with the same approaches. We only consider these field sensors for  $SWE$  measurements in terms of their continuous and autonomous capacities, from the perspective of an operational networking context, including criteria on price, low maintenance and relatively easy installation without requiring heavy infrastructure. The four instruments we analyzed are: CRNP with two experimental setups, i.e., instrument in the ground and above the snow; GMON; 24-GHz FMCW-Radar; and GNSSR (see Table 1 for acronyms and Fig. 1 for the experimental setup). They are all capable of working on batteries and solar panels, by adjusting, if necessary in certain cases, the measurement protocol, i.e., by reducing the frequency of acquisition and on-board data processing. Nine criteria were considered (Table 3): the  $SWE_{max}$  capability; other measured parameters; whether ancillary data were required for  $SWE$  retrieval; the temporal sampling rate, i.e., whether they were capable of continuous measurement capability; **the footprint of the sensor**; the main strength of the approach; their critical drawbacks; their relative prices; and the possibility of other applications.

[Table 3 here](#)

To complement the main criteria that are presented in Table 3, we include the following additional considerations, which are reported in the literature, by order of presentation rather than order of merit ~~or not~~:

- CRNP approach is based on neutron component that has absorption mean free path about an order of magnitude larger than that for gamma radiation. This makes it the most efficient system for very deep snowpack analysis (Paquet et al. 2008). Measurements over a snowpack of up to 2000 mm  $SWE$  were performed using the

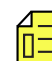



641 SnowFox sensor at the UC Berkeley Central Sierra Snow Lab in Soda Springs, CA (2 120  
 642 m asl; <https://vcresearch.berkeley.edu/research-unit/central-sierra-snow-lab>). The  
 643 cost of the CRNP-based sensor that is manufactured by Hydroinnova (SnowFox or CRS-  
 644 1000/B, Hydroinnova, Albuquerque, NM) is about 16 500 USD for full setup (11 000  
 645 USD for sensor only). As previously mentioned, ancillary sensors (atmospheric  
 646 humidity and barometric pressure sensors) must be added.

- 647 - CRNP is inherently less sensitive to interference from vegetation compared to systems  
 648 that are based on lower frequencies (FMCW-Radar and GNSSR). This is in part because  
 649 the attenuation coefficient for fast neutrons ( $\sim 0.01 \text{ m}^{-2} \text{ kg}$  in water, Murray and  
 650 Holbert, 2020) is an order of magnitude smaller than the analogous attenuation  
 651 coefficient in vegetation for GNSS microwaves (1.5 GHz) (e.g., Wigneron et al., 2017).  
 652 Moreover, vegetation can itself be a significant source of electromagnetic emissions  
 653 (Larson et al., 2014; Wigneron et al., 2017), but not neutron emissions.
- 654 - The instruments pointing toward the soil, CRNP and GMON above the surface, can be  
 655 affected by heavy rainfall on snow leading to erroneous SWE estimates that are due  
 656 to the occurrence of ponding water below the snow (Bogena et al., 2020). Installation  
 657 on well-drained soils can mitigate these effects.
- 658 - Counter-based sensors such as CRNP and GMON need to accumulate enough counts  
 659 for reliable SWE estimates. Thus, it may be necessary to accumulate the counts over  
 660 an adjusted period of time (several hours, depending on the case), so that the  
 661 measurement is not continuous. This can prevent accurate detection of short events,  
 662 sudden heavy snowfalls, for example. For the GMON, depending on the type of soil at  
 663 the measurement site, gamma ray emissions may not be sufficient and could require  
 664 a longer integration period, as is the case for sites with thick organic soil layers. It  
 665 is possible to enrich gamma emissions by using bags or pipes of potassium-rich fertilizer,  
 666 thereby maintaining a shorter integration time. We achieved success with this  
 667 approach at the NEIGE-FM site, yielding significantly higher count strengths (Fig. 2g)  
 668 (Wright et al., 2011).
- 669 - FMCW-Radar. With this technique, as previously stated, penetration depth strongly  
 670 depends on the measurement frequency. Generally, high frequency instruments  
 671 result in higher resolution measurements, but these are also affected by greater signal  
 672 attenuation, i.e., by a reduced depth of penetration.
- 673 - GNSS electromagnetic waves can be attenuated under the forest canopy, as the forest  
 674 transmittivity at 1.5 GHz is not negligible (Wigneron et al., 2017). Yet, because we  
 675 normalized the signal beneath the snow against the one acquired above the  
 676 snowpack, when both antennas were placed under the canopy, this effect should not  
 677 alter retrieval.
- 678 - GNSSR is not well suited to very steep mountainous terrain (e.g., deep-valley  
 679 bottoms), given that a rather wide sky-view factor is needed by the instrument, but  
 680 this view can be limited in such environments, depending on slope and location (Koch  
 681 et al., 2019).

682



The main conclusions that emerge from Table 3 and the aforementioned remarks are the following, recalling that each approach has its own advantages and limitations (by order of presentation rather than by order of merit):

- CRNP on the ground: This is the most efficient system for very deep snowpack ( $\geq 5$  meters of snow depth), as is the case in mountain environments or northerly areas that are witness to winter lake-effect snowfall. It has good accuracy over a large range of measurements, typically 12% for 0-2000 mm SWE. The main drawback is that it requires auxiliary sensors for SWE retrieval (synchronous data from a reference station and atmospheric pressure and humidity measurements). This is a robust and mature approach, as proven by the French EDF experience (Gottardi et al., 2013; Lejeune et al., 2019); however, it based on a system that is yet to be exploited commercially. The alternative sensor is the SnowFox system (<https://hydroinnova.com>), which is relatively new and still needs to demonstrate its robustness.
- CRNP above the snow: The most interesting system for measuring SWE over a large footprint, but it is limited to shallow snowpacks. It is the only approach that can provide an integrated spatial measurement. Schattan et al. (2017) estimated the theoretical winter footprint over snow, which they defined as the distance from where neutrons originate. They found that 86%, 63% and 50% of neutrons originate within respective distances of 273, 102, and 49 m. In practice, the authors found that the average footprint during the season, based on measurements over almost three snow seasons, was estimated to be around 230 m. This approach also needs thorough calibration for each site in terms of soil moisture corrections, which can be difficult over a large area.
- GMON: This is one of the most mature instruments for snowpack that is not too deep (max 2.5 to 3 m snow depth), with an interesting medium footprint (2-3 m). Yet, it needs systematic site calibration for soil moisture characterization, which can increase the uncertainty of measurements, particularly at the end of the season when the soil is potentially saturated. It is the most expensive of the four instruments (around 20 000 \$CAD). This system has proved its robustness and accuracy within the operational Hydro-Quebec Canadian network over a wide variety of environments for almost 10 years (Choquette et al., 2013).
- FMCW-Radar: its weak point is its limitation in measuring the SWE of wet snow. Yet, the instrument is very useful for dry snowpack characterization, in terms of stratigraphy or for avalanche studies, and also for detection of snowmelt events. Moreover, it is not expensive (800 Euros). As it is very light weight and compact, one of its strengths is its potential capability to retrieve SWE from remotely piloted aircraft above arctic snowpacks.
- GNSSR: The potential of the GNSSR approach is strong, given its capability of measuring SWE, SD and LWC with high accuracy. For SWE retrieval, its performance remains very good ( $\sim 10\%$  in the range of 0-1000 mm) and has the capacity of measuring deep snowpack (up to 5 m snow depth). It is an inexpensive (7 000 Euros), light and compact system. SWE accuracy for wet snow has yet to be improved.



## 5. Conclusions

In this paper, we evaluated four types of SWE sensors that have all reached a certain level of maturity enabling deployments of autonomous networks. These include the Cosmic Ray Neutron probe (CRNP), the Gamma Ray Monitoring (GMON) sensor, the frequency-modulated continuous-wave radar at 24 GHz (FMCW-Radar), and the Global Navigation Satellite System receiver (GNSSR) (see Table 1). This new generation of light, practical and low-cost systems that are based on electromagnetic-wave measurement are now commercially available. The GMON is already operationally used in Québec, Canada, for hydrological purposes (Hydro-Québec).

The analysis of their performances that are summarized in Tables 2 (accuracies) and 3 (pros and cons) show that each approach has its strengths and weaknesses. The synthesis of their advantages/disadvantages shows that:

- CRNP that is placed in the ground beneath the snow is the only system capable of measuring very deep snowpacks. This approach is based on measurements of natural cosmic ray fluxes, which are variable in time, and unfortunately needs complementary atmospheric measurements (temperature, pressure and atmospheric humidity) at each site for correcting the signal and must be normalized against a nearby reference site (available worldwide). The footprint of this sensor is quasi-punctual, a drawback that can be overcome by placing the sensor above the snow, but at the expense of its singularly diminished capacity (max ~150 – 300 mm SWE).
- The GMON has very good accuracy below 12%, but it is limited to snow covers that are not too thick (up to ~800 mm SWE). Its 2-3 m diameter footprint is a useful advantage, but this approach needs systematic site calibration for soil moisture characterization. Also, it is the most expensive of the four instruments that were considered.
- The FMCW-Radar is not recommended for automatic SWE monitoring, as it is limited to dry snow. Yet, it is very sensitive to wet snow, which makes it a very useful sensor for snow melt detection (wet avalanche forecasting, for example).
- The GNSSR permits the simultaneous retrieval of three key snowpack parameters: SWE, snow depth and Liquid Water Content. Given that the sensor is a low cost, light and compact option, this approach appears to have the strongest potential for a wide range of applications.

The requirement of automatic instrumentation networks for snow water equivalent monitoring to improve seasonal snowpack retrievals is important for several applications. For example, dense spatially distributed networks of SWE instruments are needed in remote and mountainous areas, for operational water resource and flood management over snow-driven watersheds, for calibrating satellite-derived SWE information, or for winter transportation safety. This review of continuous-monitoring SWE sensors is intended to help researchers and decision makers choose the one system that is best suited to their needs.



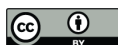

771

772

773 **Acknowledgements**

774 We acknowledge all of the students who have contributed to the field measurements,  
775 including Amandine Pierre, Maxime Beaudoin-Galaise and Benjamin Bouchard from  
776 Université Laval, and Patrick Pomerleau, Fannie Larue and Alex Mavrovic from Université  
777 de Sherbrooke. We thank, for their support, the staff from Forêt Montmorency and from  
778 the Université de Sherbrooke: Patrick Cliche, Patrick Ménard and Gabriel Diab. We also  
779 thank Alexandre Vidal, Hydro-Québec, and Vincent Fortin, **Environment Canada and**  
780 **Climate Change** (ECCC).

781

782 **Funding:**

783 This project was funded by the Natural Sciences and Engineering Research Council of  
784 Canada (NSERC), the Canadian Foundation for Innovation (CFI), Environment and Climate  
785 Change Canada (ECCC), and Fonds de recherche du Québec – Nature et technologies  
786 (FQRNT), Government of Quebec.

787

788 **Conflict of interest:**

789 The authors declare absolutely no conflicts of interest or business relationships with any  
790 of the manufacturers that are mentioned in this article. The mention of commercial  
791 companies or products does not constitute a commercial endorsement of any instrument  
792 or manufacturer by the authors.

793

794

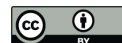

Table 2 Accuracy analysis for the 4 systems considered. The Range measurement indicates the highest SWE (mm) value on which the analysis was performed. RMSD: Root Mean Square Difference.  $R^2$  is the determination coefficient of the linear regression analysis. Pts: number of in situ manual samples. “-” means no information available

| Sensor              | Reference data | Range SWE (mm) | Accuracy RMSD (mm), $R^2$ (slope, intercept) | References, sites, number of points                                                                  |
|---------------------|----------------|----------------|----------------------------------------------|------------------------------------------------------------------------------------------------------|
| CRNP in the ground  | Manual snowpit | 200            | 14 mm, $R^2 = 0.96$ (0.78, 8.5 mm)           | This study (Fig. 3), 7 pts                                                                           |
|                     | GMON           | 200            | 28 mm, $R^2 = 0.89$ (0.79, -3.9 mm)          | This study (Fig. 3), 2008-2009 season                                                                |
|                     | -              | -              | 5 – 10%                                      | Hydroinnova communication <sup>1</sup>                                                               |
|                     | Manual snowpit | 1700           | -, $R^2 = 0.98$ (0.99, 2.8 mm)               | Gotterdi et al. (2013) EDF system, Alps and Pyrénées 320 year.sites, 1037 pts.                       |
| CRNP above the snow | -              | -              | 5 – 10%                                      | CRS-1000/B Hydroinnova communication <sup>2</sup>                                                    |
| GMON                | Manual snowpit | 500            | 34 mm (12%), $R^2 = 0.93$ (0.997, 17.1 mm)   | This study (Fig. 3 and 4) and Pomerleau et al. (2020), SIRENE et NEIGE-FM, 64 pts                    |
|                     | Manual snowpit | 200            | 40 mm, $R^2 = 0.92$ (1.16, 16.8 mm)          | Smith et al., 2017, Sodankylä, Finland, 30 pts                                                       |
|                     | Manual snowpit | 250            | 23 mm, $R^2 = 0.90$ (0.904, 27.5 mm)         | Smith et al., 2017, Caribou Creek, Canada, 19 pts                                                    |
|                     | Manual snowpit | 700            | 48 mm, $R^2 = 0.92$ (0.881, 32.4 mm)         | Smith et al., 2017, Fortress Mountain, Canada, 8 pts                                                 |
|                     | Snow-pillow    | 200            | -, $R^2 = 0.95$ (1.20, 14 mm)                | Smith et al., 2017, Davos, Switzerland                                                               |
|                     | -              | 300<br>600     | ±15 mm<br>±15%                               | Campbell Scientific CS725 manual <sup>3</sup>                                                        |
| FMCW-Radar 24 GHz   | Manual snowpit | 500            | 38 mm (14%), $R^2 = 0.73$ (0.80, 65.0 mm)    | This study (Fig. 4) and Pomerleau et al., 2020, 46 pts, dry snow                                     |
|                     | Manual snowpit | 750            | 59 mm (30%), $R^2 = 0.87$ (0.98, 0)          | Pomerleau et al., 2020, manual measurements, multi sites Northern Québec, Canada, 78 points dry snow |
| GNSSR               | Manual snowpit | 500            | 32 mm (11%), $R^2 = 0.93$ (1.05, -7.9 mm)    | This study (Fig. 4), 18 points                                                                       |
|                     | Manual snowpit | > 2000         | ± 15 mm                                      | SnowSense Vista Inc. manual <sup>4</sup> , good conditions                                           |
|                     | Manual snowpit | 700            | 23 mm, $R^2 = 0.995$ (0.98, 5.52 mm)         | Henkel et al. 2018, Davos, , Switzerland                                                             |
|                     | Snow-pillow    | 700            | 11 mm $R^2 = 0.999$ (1.01, 1.97 mm)          |                                                                                                      |
|                     | Manual snowpit | 1000           | 45 mm $R^2 = 0.98$ (0.98, 31.4 mm)           | Koch et al., 2019 dry snow, 3 winters                                                                |
|                     | Snow-pillow    | 1000           | 103 mm $R^2 = 0.86$ (0.88, 67.3 mm)          | Koch et al., 2019 wet snow, 3 winters                                                                |
|                     |                |                | 30 mm $R^2 = 0.99$ (0.97, 30.5 mm)           | Koch et al., 2019 dry snow                                                                           |
|                     |                |                | 72 mm $R^2 = 0.93$ (0.92, 65.0 mm)           | Koch et al., 2019 wet snow                                                                           |

<sup>1</sup> [https://hydroinnova.com/\\_downloads/snowfox\\_v1.pdf](https://hydroinnova.com/_downloads/snowfox_v1.pdf), Hydroinnova, Albuquerque, NM

<sup>2</sup> Hydroinnova, Albuquerque, NM; [http://hydroinnova.com/snow\\_water.html](http://hydroinnova.com/snow_water.html)

<sup>3</sup> Campbell Scientific (Canada) Corporation, CS725 manual, [https://s.campbellsci.com/documents/ca/manuals/cs725\\_man.pdf](https://s.campbellsci.com/documents/ca/manuals/cs725_man.pdf).

<sup>4</sup> <https://www.vista-geo.de/en/snowsense/>

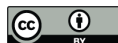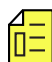

Table 3 Pro and Cons of the four systems that were considered for SWE monitoring. SM: Soil Moisture. FOV: Field-of-View. The approximate price is given (2021), subject to change according to exchange rate fluctuations.

| Sensors                                                  | CNRP                                                                             |                                                                      | GMON                                                 | FMCW-Radar 24 GHz                                                                                    | GNSSR                                                    |
|----------------------------------------------------------|----------------------------------------------------------------------------------|----------------------------------------------------------------------|------------------------------------------------------|------------------------------------------------------------------------------------------------------|----------------------------------------------------------|
|                                                          | CRNP on the ground                                                               | CRNP above the snow                                                  |                                                      |                                                                                                      |                                                          |
| <b>SWE<sub>max</sub></b>                                 | > 2000 mm                                                                        | ~150-300 mm                                                          | ~800 mm                                              | ~1000 mm                                                                                             | > 1500 mm                                                |
| <b>Other measured parameters</b>                         | -                                                                                | SM                                                                   | SM                                                   | Melt detection                                                                                       | SD, LWC                                                  |
| <b>Other sensors needed</b>                              | P, T <sub>air</sub> , RH                                                         | P, T <sub>air</sub> , RH                                             | -                                                    | SD                                                                                                   | -                                                        |
| <b>Typical sampling rate</b>                             | Discontinuous <sup>a</sup>                                                       | Discontinuous <sup>a</sup>                                           | Discontinuous <sup>a</sup>                           | Continuous                                                                                           | Not strictly continuous <sup>b</sup>                     |
| <b>Footprint</b>                                         | ~1 m <sup>2</sup>                                                                | 20-40 ha<br>(300 000 m <sup>2</sup> )                                | FOV 60°<br>Typically, 3 - 10 m <sup>2</sup> *        | FOV ±32.5° azimuth and<br>±12° elevation, 0.4 m <sup>2</sup> *                                       | ~1 m <sup>2</sup>                                        |
| <b>Price (US\$)</b>                                      | Hydroinnova: 11 000 (sensor only)<br>EDF: Not marketed (on request) <sup>c</sup> |                                                                      | 16 600<br>(sensor only)                              | 1 000<br>(radar and software <sup>d</sup> )                                                          | 8 550<br>(complete station <sup>e</sup> )                |
| <b>Main advantage</b>                                    | Very deep snowpack                                                               | Large footprint                                                      | Medium footprint<br>Deep snowpack                    | Medium footprint<br>Deep snowpack<br>Very light and compact<br>Low cost                              | Very deep snowpack<br>SD and LWC<br>Low cost             |
| <b>Main inconvenience</b>                                | SM issue<br>Needs ancillary measurements                                         | SM knowledge needed,<br>Needs ancillary measures<br>Shallow snowpack | SM knowledge needed                                  | Dry snow only                                                                                        | Large sky view<br>factor required                        |
| <b>Other drawbacks</b>                                   | Cost<br>EDF system not commercially available                                    | Cost                                                                 | Relatively expensive                                 | Not turnkey<br>Ice crust within the snowpack                                                         | SWE estimates for wet snow must be improved              |
| <b>Main applications, Capability (see text) Comments</b> | Hydrology<br>Network operational by EDF <sup>c</sup>                             | Hydrology, SM                                                        | Hydrology, SM<br>Network operational by Hydro-Québec | SM, Stratigraphy, Avalanche, Melting monitoring<br>Lake ice thickness<br>RPA capability <sup>f</sup> | Hydrology, SM <sup>g</sup><br>Avalanche, Melt monitoring |

<sup>a</sup> Counts must be accumulated over a specified period, e.g. 6h, 12h, or longer. <sup>b</sup> GNSS signals must be averaged over a period of time for noise reduction; the typical measurement cycle: 1. per day (possibly up to 6 per day). <sup>c</sup> System based on a sensor that is not commercialized. <sup>d</sup> Software for sensor settings and reading/recording data, but not for SWE retrievals. <sup>e</sup> Subscription license required. <sup>f</sup> Remotely Piloted Aircraft capability.

\* Depending on the height of the sensor on its support mast above snow, Field-of-View (FOV) given for 3 m mast.



## References

For references related to a sensor, the name of the sensor has been highlighted in **bold**.

- Alonso, R., Pozo, J.M.G.d., Buisán, S.T., and Álvarez, J.A.: Analysis of the Snow Water Equivalent at the AEMet-Formigal Field Laboratory (Spanish Pyrenees) During the 2019/2020 Winter Season Using a Stepped-Frequency Continuous Wave Radar (SFCW), *Remote Sens.*, 13, 616. <https://doi.org/10.3390/rs13040616>, 2021. (**SFCW radar**)
- Andreasen, M., Jensen, K. H., Desilets, D., Franz, T., Zreda, M., Bogena, H., and Looms, M.C.: Status and perspectives of the cosmic-ray neutron method for soil moisture estimation and other environmental science applications. *Vadose Zone J.*, 16, 1–11. doi: 10.2136/vzj2017.04.0086, 2017. (**CNRP**)
- Bissell, V.C., and Peck, E.L.: Monitoring snow water equivalent by using natural soil radioactivity. *Water Resour. Res.*, 9, 885–890, 1973. (**GMON**)
- Bogena, H.R., Herrmann, F., Jakobi, J., Brogi, C., Ilias, A., Huisman, J.A., Panagopoulos, A., and Pisinaras, V.: Monitoring of Snowpack Dynamics With Cosmic-Ray Neutron Probes: A Comparison of Four Conversion Methods. *Front. Water*, 2, 19, doi: 10.3389/frwa.2020.00019, 2020. (**CNRP**)
- Bormann, K.J., Westra, S., Evans, J.P., and McCabe, M.F.: Spatial and temporal variability in seasonal snow density, *J. Hydrol.*, 484, 63–73, 2013.
- Brown, R.D., Fang, B., and Mudryk, L.: Update of Canadian Historical Snow Survey Data and Analysis of Snow Water Equivalent Trends, 1967–2016, *Atmosphere-Ocean*, DOI: 10.1080/07055900.2019.1598843, 2019.
- Brown, R.D., Smith, C., Derksen, C., and Mudryk, L.: Canadian In Situ Snow Cover Trends for 1955–2017 Including an Assessment of the Impact of Automation, *Atmosphere-Ocean*, DOI: 10.1080/07055900.2021.1911781, 2021.
- Carroll, T. R.: Airborne Gamma Radiation Snow Survey Program: A user's guide, Version 5.0. National Operational Hydrologic Remote Sensing Center (NOHRSC), Chanhassen, 14, <https://www.nohrsc.noaa.gov/snowsury/>, 2001. (**GMON**)
- Choquette, Y., Ducharme, P., and Rogoza, J.: CS725, an accurate sensor for the snow water equivalent and soil moisture measurements, in: *Proceedings of the International Snow Science Workshop, Grenoble, France, 7–11 October 2013*, 2013 (**GMON**)
- Clark, M. P., Hendrikx, J., Slater, A. G., Kavetski, D., Anderson, B., Cullen, N. J., Kerr, T., Hreinsson, E. Ö., and Woods, R. A.: Representing spatial variability of snow water equivalent in hydrologic and land-surface models: A review, *Water Resour. Res.*, 47, W07539, doi:10.1029/2011WR010745, 2011.
- Desilets, D., Zreda, M., and Ferré, T.P.A.: Nature's neutron probe: Land surface hydrology at an elusive scale with cosmic rays, *Water Resour. Res.*, 46, 1–7, 2010. (**CNRP**)
- Desilets, D., and Zreda, M.: Footprint diameter for a cosmic-ray soil moisture probe: Theory and Monte Carlo simulations, *Water Resour. Res.*, 49, 3566–3575, 2013. (**CNRP**)
- Desilets, D.: Calibrating a non-invasive cosmic ray soil moisture probe for snow water equivalent, *Hydroinnova Technical Document 17-01*, doi:10.5281/zenodo.439105, 2017. (**CNRP**)
- Dixon, D., and Boon, S.: Comparison of the SnowHydro snow sampler with existing snow tube designs. *Hydrologic Processes*, 20, 2555–2562, DOI: 10.1002/hyp.9317, 2012.
- Dong, C.: Remote sensing, hydrological modeling and in situ observations in snow cover research: A review. *J. Hydrol.*, 561 (2018) 573–583, 2018.
- Ducharme, P., Houdayer, A., Choquette, Y., Kapfer, B., and Martin, J. P.: Numerical Simulation of Terrestrial Radiation over A Snow Cover. *J. Atmos. Ocean. Technol.*, 32, 1478–1485, 2015. (**GMON**)
- Ellerbruch, D., and Boyne, H.: Snow Stratigraphy and Water Equivalence Measured with an Active Microwave System. *J. Glaciol.* 26, 225–233, 1980. (**FMCW-Radar**)
- Fujino, K., Wakahama, G., Suzuki, M., Matsumoto, T., and Kuroiwa, D.: Snow stratigraphy measured by an active microwave sensor. *Ann. Glaciol.*, 6, 207–210, 1985. (**FMCW-Radar**)
- Goodison, B.E., Glynn, J.E., Harvey, K.D., and Slater, J.E.: Snow Surveying in Canada: A Perspective, *Can. Water Resour. J.*, 12:2, 27–42, DOI: 10.4296/cwrj1202027, 1987.
- Goodison, B., Ferguson, H., and McKay, G.: Measurement and data analysis, in *Handbook of Snow: Principles, Processes, Management and Use*, pp. 191–274, Pergamon Press Canada, Toronto, Canada, 1981.
- Gottardi, F., Carrier, P., Paquet, E., Laval, M.-T., Gailhard, J., and Garçon, R.: Le NRC: Une décennie de mesures de l'équivalent en eau du manteau neigeux dans les massifs montagneux français. In *Proceedings of the International Snow Science Workshop Grenoble, 7–11 October 2013*, 926–930, 1981. (**CNRP**)



- GPRI brochure: GAMMA Portable Radar Interferometer (GPRI) [https://gamma-rs.ch/uploads/media/Instruments\\_Info/gpri2\\_brochure\\_20160708.pdf](https://gamma-rs.ch/uploads/media/Instruments_Info/gpri2_brochure_20160708.pdf), 2021. **(Radar)**
- Gunn, G.E., Duguay, C.R., Brown, L.C., King, J., Atwood, D., and Kasurak, A.: Freshwater Lake Ice Thickness Derived Using Surface-based X- and Ku-band FMCW Scatterometers. *Cold Reg. Sci. Technol.*, 120, 115–126, 2015. **(FMCW-Radar)**
- Henkel, P., Koch, F., Appel, F., Bach, H., Prasch, M., Schmid, L., Schweizer, J., and Mauser, W.: Snow water equivalent of dry snow derived from GNSS Carrier Phases. *IEEE Trans. Geosci. Remote Sens.*, 56(6), 3561–3572. <https://doi.org/10.1109/TGRS.2018.2802494>, 2018. **(GNSSR)**
- Hu, X., Ma, C., Hu, R., and Yeo, T. S.: Imaging for Small UAV-Borne FMCW SAR. *Sensors*, 19, 87, doi: 10.3390/s19010087, 2019. **(FMCW-Radar)**
- IMST: IMST sentireTM Radar Module 24 GHz sR-1200 Series User Manual. Available online: <http://www.radar-sensor.com/>, 2021 **(FMCW-Radar)**
- Key, J., Goodison, B., Schöner, W., Godø, Ø., Ondráš, M., and Snorrason, Á.: A Global Cryosphere Watch. *Arctic*, 68, 1, 48 – 58. <http://dx.doi.org/10.14430/arctic4476>, 2015.
- Kinar, N. J., and Pomeroy, J. W.: Measurement of the physical properties of the snowpack. *Rev. Geophys.* 53, 481–544. doi: 10.1002/2015RG000481, 2015.
- King J., Kelly, R., Kasurak, A., Duguay, C., Gunn, G., Rutter, N., Watts, T., and Derksen C.: Spatio-temporal influence of tundra snow properties on Ku-band (17.2 GHz) backscatter. *J. Glaciol.*, 61(226), doi: 10.3189/2015JoG14J020, 2015. **(Radar)**
- Kirkham, J.D., Koch, I., Saloranta, T.M., Litt, M., Stigter, E.E., Møen, K., Thapa, A., Melvold, K., and Immerzeel, W.W.: Near Real-Time Measurement of Snow Water Equivalent in the Nepal Himalayas. *Front. Earth Sci.* 7:177. doi: 10.3389/feart.2019.00177, 2019. **(GMON)**
- Koch, F., Henkel, P., Appel, F., Schmid, L., Bach, H., Lamm, M., Prasch, M., Jürg Schweizer, J., and Mauser, W.: Retrieval of snow water equivalent, liquid water content, and snow height of dry and wet snow by combining GPS signal attenuation and time delay. *Water Resour. Res.*, 55, 4465–4487. <https://doi.org/10.1029/2018WR024431>, 2019. **(GNSSR)**
- Koh, G., Yankielun, N.E., and Baptista, A.I.: Snow cover characterization using multiband FMCW radars. *Hydrol. Process.*, 10, 1609–1617, 1996. **(FMCW-Radar)**
- Laliberté, J., Langlois, A., Royer, A., Madore, J.-B., and Gauthier, F.: Retrieving high contrasted interfaces in dry snow using a frequency modulated continuous wave (FMCW) Ka-band radar: a context for dry snow stability, *Physical Geography*, In revision (TPHY-S-21-00044), 2021. **(FMCW-Radar)** To be updated
- Langlois, A.: Applications of the PR Series Radiometers for Cryospheric and Soil Moisture Research. Publisher: Radiometrics Corporation [http://radiometrics.com/products-services/total\\_profiling/pr-series/](http://radiometrics.com/products-services/total_profiling/pr-series/), 2015. **(Radiometer)**
- Larson, K., Gutmann, E., Zavorotny, V., Braun, J., Williams, M., and Nievinski, F.: Can we measure snow depth with GPS receivers? *Geophys. Res. Lett.*, 36, L17502. <https://doi.org/10.1029/2009GL039430>, 2009. **(GNSSR)**
- Larson, K. M., and Small, E. E.: Normalized microwave reflection index: A vegetation measurement derived from GPS networks, *IEEE J. Sel. Topics Appl. Earth Observ. Remote Sens.*, 7(5), 1501–1511, doi: 10.1109/JSTARS.2014.2300116, 2014. **(GNSSR)**
- Larson, K. M.: GPS interferometric reflectometry: Applications to surface soil moisture, snow depth, and vegetation water content in the western United States. *Wiley Interdisciplinary Reviews: Water*, 3(6), 775–787. <https://doi.org/10.1002/wat2.1167>, 2016. **(GNSSR)**
- Larue, F., Royer, A., De Sève, D., Roy, A., Picard, G., Vionnet, V.: Simulation and assimilation of passive microwave data using a snowpack model coupled to a calibrated radiative transfer model over North-Eastern Canada, *Water Resour. Res.*, 54, 4823–4848, <https://doi.org/10.1029/2017WR022132>, 2018.
- Leinss, S., Wiesmann, A., Lemmetyinen, J., and Hajnsek, I.: Snow Water Equivalent of Dry Snow Measured by Differential Interferometry. *IEEE J. Sel. Topics Appl. Earth Observ. Remote Sens.*, 8(8), 3773–379, 2015. **(SnowScat)**
- Lejeune, Y., Dumont, M., Panel, J.-M., Lafaysse, M., Lapalus, P., Le Gac, E., Lesaffre, B., and Morin, S.: 57 years (1960–2017) of snow and meteorological observations from a mid-altitude mountain site (Col de Porte, France, 1325 m of altitude), *Earth Syst. Sci. Data*, 11, 71–88, <https://doi.org/10.5194/essd-11-71-2019>, 2019.
- Marshall, H., Koh, G., and Forster, R.: Estimating alpine snowpack properties using FMCW radar. *Ann. Glaciol.*, 40, 157–162, 2005. **(FMCW-Radar)**
- Marshall, H.-P., Schneebeli, M., and Koh, G. Snow stratigraphy measurements with high-frequency FMCW radar: Comparison with snow micro-penetrometer. *Cold Reg. Sci. Technol.*, 47, 108–117, 2007. **(FMCW-Radar)**



- Marshall, H.-P., and Koh, G.: FMCW radars for snow research. *Cold Reg. Sci. Technol.*, 52, 118–131, 2008.
- Mätzler, C.: Microwave permittivity of dry snow, *IEEE Trans. Geosci. Remote Sens.*, 48, 50–58, 1986.
- Meloche, J., Langlois, A., Rutter, N., Royer, A., King, J., and Walker, B.: Characterizing Tundra snow sub-pixel variability to improve brightness temperature estimation in satellite SWE retrievals, *The Cryosphere Discussion* (Submitted tc-2021-156), 2021. To be updated
- Meredith, M., Sommerkorn, M., Cassotta, S., Derksen, C., Ekaykin, A., Hollowed, A., Kofinas, G., Mackintosh, A., Melbourne-Thomas, J., Muelbert, M.M.C., Ottersen, G., Pritchard, H., Schuur, E.A.G.: Polar Regions. In: *IPCC Special Report on the Ocean and Cryosphere in a Changing Climate* [H.-O. Pörtner, D.C. Roberts, V. Masson-Delmotte, P. Zhai, M. Tignor, E. Poloczanska, K. Mintenbeck, A. Alegría, M. Nicolai, A. Okem, J. Petzold, B. Rama, N.M. Weyer (eds.)]. <https://www.ipcc.ch/srocc/chapter/chapter-3-2/>, 2019.
- Murray, R. M., and Holbert, K. E.: *Nuclear Energy: An Introduction to the Concepts, Systems, and Applications of Nuclear Processes*, Eighth Edition, Imprint Butterworth-Heinemann, Elsevier Inc., 624 p. DOI <https://doi.org/10.1016/C2016-0-04041-X>, 2020. **(CNRP)**
- Okorn, R., Brunnhofer, G., Platzer, T., Heilig, A., Schmid, L., Mitterer, C., Schweizer, J., and Eisen, O.: Upward-looking L-band FMCW radar for snow cover monitoring. *Cold Reg. Sci. Technol.*, 103, 31–40, 2014. **(FMCW-Radar)**
- Paquet, E. and Laval, M.T.: Retour d'expérience et perspectives d'exploitation des Nivomètres à Rayonnement Cosmique d'EDF / Operation feedback and prospects of EDF Cosmic-Ray Snow Sensors. *La Houille Blanche* 2006-2, 113–119, 2006. **(CNRP)**
- Paquet, E., Laval, M., Basalaev, L. M., Belov, A., Eroshenko, E., Kartyshev, V., Struminsky, A., and Yanke, V.: An application of cosmic-ray neutron measurements to the determination of the snow-water equivalent, *Proc. 30th Int. Cosm. Ray Conf.*, Mexico City, Mexico, 2008, 1, 761–764, 2008. **(CNRP)**
- Peng, Z., and Li, C.: Portable Microwave Radar Systems for Short-Range Localization and Life Tracking: A Review, *Sensors*, 19, 1136, 2019. **(FMCW-Radar)**
- Pieraccini, M., and Miccinesi, L.: Ground-Based Radar Interferometry: A Bibliographic Review, *Remote Sens.*, 11(9), 1029, 2019. <https://doi.org/10.3390/rs11091029>. **(Radar)**
- Pirazzini, R., Leppänen, L., Picard, G., Lopez-Moreno, J. I., Marty, C., Macelloni, G., Kontu, A., von Lerber, A., Tanis, C. M., Schneebeli, M., de Rosnay, P., and Arslan, A. N.: European in-situ snow measurements: practices and purposes, *Sensors* 18:2016. doi: 10.3390/s18072016, 2018.
- Prince, M., Roy, A., Royer, A., and Langlois, A.: Timing and Spatial Variability of Fall Soil Freezing in Boreal Forest and its Effect on SMAP L-band Radiometer Measurements, *Remote Sens. Environ.*, 231, 111230, 2019.
- Proksch, M., Rutter, N., Fierz, C., and Schneebeli, M.: Intercomparison of snow density measurements: Bias, precision, and vertical resolution, *Cryosphere*, 10, 371–384, 2016.
- Rasmussen, R., Baker, B., Kochendorfer, J., Meyers, T., Landolt, S., Fischer, A. P., Black, J., Thériault, J. M., Kucera, P., Gochis, D., Smith, C., Nitu, R., Hall, M., Ikeda, K., and Gutmann, E.: How Well Are We Measuring Snow: The NOAA/FAA/NCAR Winter Precipitation Test Bed, *Bull. Am. Meteorol. Soc.*, 93, 811–829, 2012.
- Rodriguez-Morales, F., Gogineni, S., Leuschen, C.J., Paden, J.D., Li, J., Lewis, C. C., Panzer, B., Alvestegui, D. G.-G., Patel, A., Byers, K., Crowe, R., Player, K., Hale, R., Arnold, E., Smith, L., Gifford, C., Braaten, D., and Panton, C.: Advanced multifrequency radar instrumentation for polar research. *IEEE Trans. Geosci. Remote Sens.* 52, 2824–2842, 2014. **(FMCW-Radar)**
- Roy, A., Royer, A., St-Jean-Rondeau, O., Montpetit, B., Picard, G., Mavrovic, A., Marchand, N., and Langlois, A.: Microwave snow emission modeling uncertainties in boreal and subarctic environments, *Cryosphere*, 10, 623–638, <http://www.the-cryosphere.net/10/623/2016/> doi:10.5194/tc-10-623-2016, 2016. **(Radiometer)**
- Roy, A., Toose, P., Williamson, M., Rowlandson, T., Derksen, C., Royer, A., Berg, A., Lemmetyinen, J., and Arnold, L.: Response of L-Band brightness temperatures to freeze/thaw and snow dynamics in a prairie environment from ground-based radiometer measurements, *Remote Sens. Environ.*, 191, 67–80, 2017. **(Radiometer)**
- Rutter, N., Sandells, M., Derksen, C., Toose, P., Royer, A., Montpetit, B., Lemmetyinen, J., and Pulliainen, J.: Snow stratigraphic heterogeneity within ground-based passive microwave radiometer footprints: implications for emission modeling, *J. Geophys. Res.-Earth Surf.*, 119, 550–565, <https://doi.org/10.1002/2013JF003017>, 2014.
- Schattan, P., Baroni, G., Oswald, S. E., Schöber, J., Fey, C., Kormann, C., Huttenlau, M., and Achleitner, S.: Continuous monitoring of snowpack dynamics in alpine terrain by aboveground neutron sensing, *Water Resour. Res.*, 53, 3615–3634, doi: 10.1002/2016WR020234, 2017. **(CNRP)**





- Schneider, M.: Automotive radar—Status and trends. In Proceedings of the German Microwave Conference, Ulm, Germany, 5–7 April 2005; pp. 144–147, 2005. **(FMCW-Radar)**
- Shah, R., Xiaolan Xu, Yueh, S., Sik Chae, C., Elder, K., Starr, B., and Kim, Y.: Remote Sensing of Snow Water Equivalent Using P-Band Coherent Reflection, *IEEE Geosci. Remote Sens. Lett.*, 14, 3, 309–313, doi: 10.1109/LGRS.2016.2636664, 2017. **(GNSSR)**
- Sigouin, M. J. P., and Si, B. C.: Calibration of a non-invasive cosmic-ray probe for wide area snow water equivalent measurement. *Cryosphere*, 10, 1181–1190, 2016 [www.the-cryosphere.net/10/1181/2016/](http://www.the-cryosphere.net/10/1181/2016/), 2016. **(CNRP)**
- Smith, C. D., Kontu, A., Laffin, R., and Pomeroy, J. W.: An assessment of two automated snow water equivalent instruments during the WMO solid precipitation intercomparison experiment, *Cryosphere*, 11, 101–116. doi: 10.5194/tc-11-101-2017, 2017. **(GMON)**
- Stranden, H. B., Ree, B. L., and Møen, K. M.: Recommendations for Automatic Measurements of Snow Water Equivalent in NVE. Report of the Norwegian Water Resources and Energy Directorate, Majorstua, Oslo, Norway, 34 p., 2015. **(GMON)**
- Tiuri, M., Sihvola, A., Nyfors, E., and Hallikainen, M.: The complex dielectric constant of snow at microwave frequencies. *IEEE J. Ocean. Eng.*, 9, 377–382, 1984.
- Vriend, N.M., McElwaine, J.N., Sovilla, B., Keylock, C.J., Ash, M., and Brennan, P. V.: High-resolution radar measurements of snow avalanches, *Geophys. Res. Lett.*, 40, 727–731, 2013. **(FMCW-Radar)**
- Werner, C., Wiesmann, A., Strozzi, T., Schneebeli, M., and Mätzler, C.: The SnowScat ground-based polarimetric scatterometer: Calibration and initial measurements from Davos Switzerland, in *Proc. IEEE Int. Geosci. Remote Sens. Symp. (IGARSS'10)*, Jul. 2010, 2363–2366, 2010. **(SnowScat)**
- Werner, C., Suess, M., Wegmüller, U., Frey, O., and Wiesmann A.: The Esa Wideband Microwave Scatterometer (Wbscat): Design and Implementation, in *Proc. IGARSS 2019 - IEEE International Geoscience and Remote Sensing Symposium*, 8339–8342, doi: 10.1109/IGARSS.2019.8900459, 2019. **(SnowScat)**
- Wiesmann, A., Werner, C., Strozzi, T., Matzler, C., Nagler, T., Rott, H., Schneebeli, M., and Wegmüller, U.: SnowScat, X-to Ku-Band Scatterometer Development, in *Proc. of ESA Living Planet Symposium*, Bergen 28.6. - 2.7. [https://gamma-rs.ch/uploads/media/Instruments\\_Info/gamma\\_snowscat.pdf](https://gamma-rs.ch/uploads/media/Instruments_Info/gamma_snowscat.pdf), 2010. **(SnowScat)**
- Wiesmann, A., Werner, C., Wegmüller, U., Schwank, M., and Mätzler, M.: ELBARA II, L-band Radiometer for SMOS Cal/Val Purposes, [https://gamma-rs.ch/uploads/media/Instruments\\_Info/ELBARAII\\_poster.pdf](https://gamma-rs.ch/uploads/media/Instruments_Info/ELBARAII_poster.pdf), 2021. **(Radiometer)**
- Wigneron, J.P., Jackson, T.J., O'Neill, P., De Lannoy, G.J., de Rosnay, P., Walker, J.P., Ferrazzoli, P., Mironov, V., Bircher, S., Grant, J.P., Kurum, M., Schwank, M., Munoz-Sabater, J., Das, N., Royer, A., Al-Yaari, A., Bitar, A. Fernandez-Moran, R., Lawrence, H., Mialon, A., Parrens, M., Richaume, P., Delwart, S., and Kerr Y.: Modelling the passive microwave signature from land surfaces: A review of recent results and application to the L-Band SMOS & SMAP soil moisture retrieval algorithms, *Remote Sens. Environ.*, 192, 238–262, 2017. **(Radiometer)**
- WMO: Global Cryosphere Watch (GCW) Implementation Plan, Version 1.6, World Meteorological Organization Report, WMO, Geneva, Switzerland, 2015.
- Work, R. A., Stockwell, H. J., Freeman, T. G., and Beaumont, R. T.: Accuracy of field snow surveys, western United States, including Alaska, Cold Regions Research and Engineering Laboratory (U.S.) Technical report, 163, 49 p., <https://hdl.handle.net/11681/5580>. 1965.
- Wright, M., Kavanaugh, K., and Labine C.: Performance Analysis of the GMON3 Snow Water Equivalency Sensor. Proceedings of The Western Snow Conference. Stateline, NV, USA, April 2011. Poster on line, <https://www.campbellsci.ca/cs725>, 2011 **(GMON)**
- Wright, M.: CS725 Frozen Potential: The Ability to Predict Snow Water Equivalent is Essential. METEOROLOGICAL TEChNOLOGY InTERnATIOnAL, August 2013, 122–123, <https://www.meteorologicaltechnologyinternational.com>, 2013. **(GMON)**
- Xu, X., Baldi, C., Bleser, J.-W., Lei, Y., Yueh, S., and Esteban-Fernandez, D.: Multi-Frequency Tomography Radar Observations of Snow Stratigraphy at Fraser During SnowEx, in *Proceedings of the IGARSS 2018-2018 IEEE International Geoscience and Remote Sensing Symposium*, Valencia, Spain, 22–27 July 2018, 2018. **(FMCW-Radar)**
- Yankielun, N.E., Ferrick, M.G., and Weyrick, P. B.: Development of an airborne millimeter-wave FM-CW radar for mapping river ice, *Can. J. Civ. Eng.*, 20, 1057–1064, 1993. **(FMCW-Radar)**
- Yankielun, N., Rosenthal, W., and Robert, D.: Alpine snow depth measurements from aerial FMCW radar. *Cold Reg. Sci. Technol.*, 40, 123–134, 2004. **(FMCW-Radar)**



Yao, H., Field, T., McConnell, C., Beaton, A., and James A.L.: Comparison of five snow water equivalent estimation methods across categories. Hydrol. Process., 32, 1894–1908, <https://doi.org/10.1002/hyp.13129>, 2018. (**GMON**)
